# Supplementary material for: Characterization and Polydispersity of Volcanic Ash Nanoparticles in Synthetic Lung Fluid
Source: MDPI journal article supplement (doi:10.3390/toxics11070624), 2023-07-19
Supplement: s1 [file s1]

# Characterization and Polydispersity of Volcanic Ash Nanoparticles in Synthetic Lung Fluid

Benedetto Schiavo<sup>1\*</sup>, Ofelia Morton-Bermea<sup>1</sup>, Diana Meza-Figueroa<sup>2</sup>, Mónica Acosta-Elías<sup>3</sup>, Belem González-Grijalva<sup>2</sup>, Maria Aurora Armienta-Hernández<sup>1</sup>, Claudio Inguaggiato<sup>4</sup>, Daisy Valera-Fernández<sup>1</sup>

## Supplementary material

**Figure S1:** Mineralogical phases recognized in ash samples. **A:** Fe-Ti oxide, **B:** Olivine, **C:** Pyroxene.

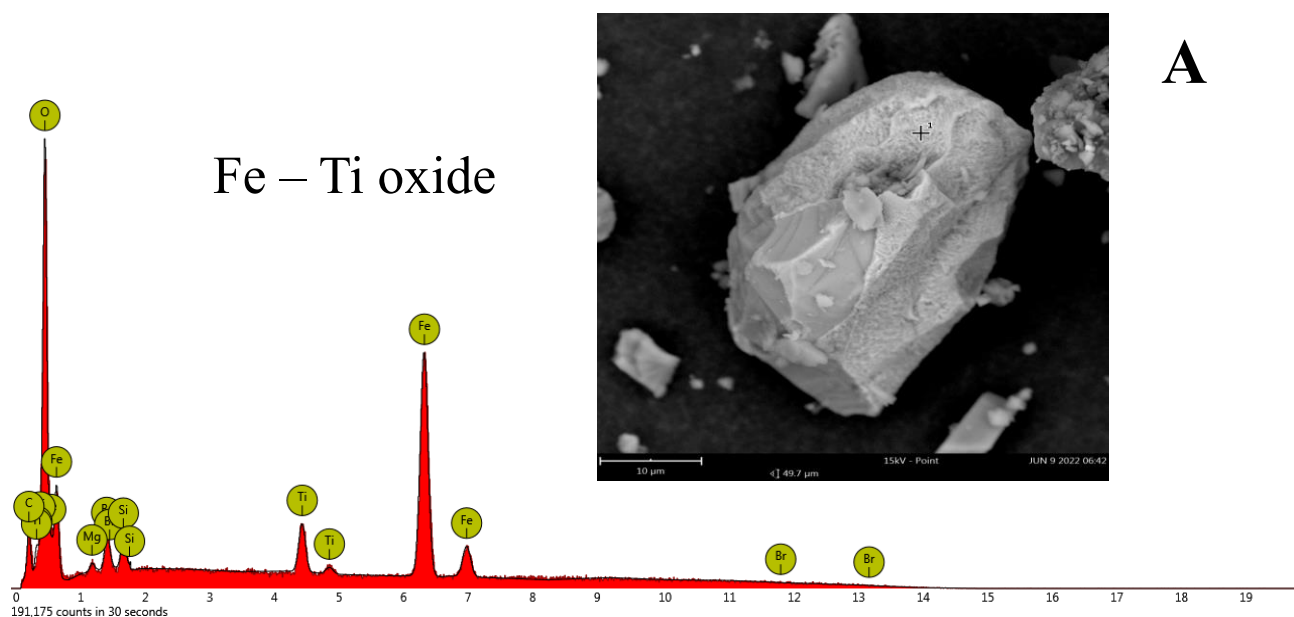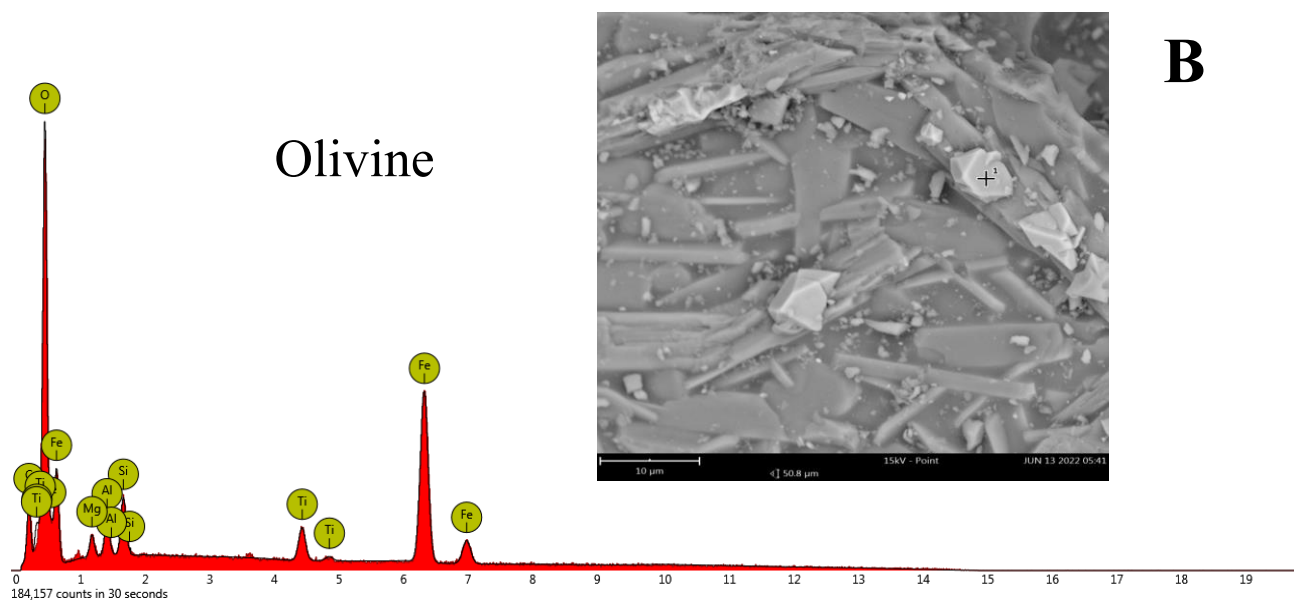

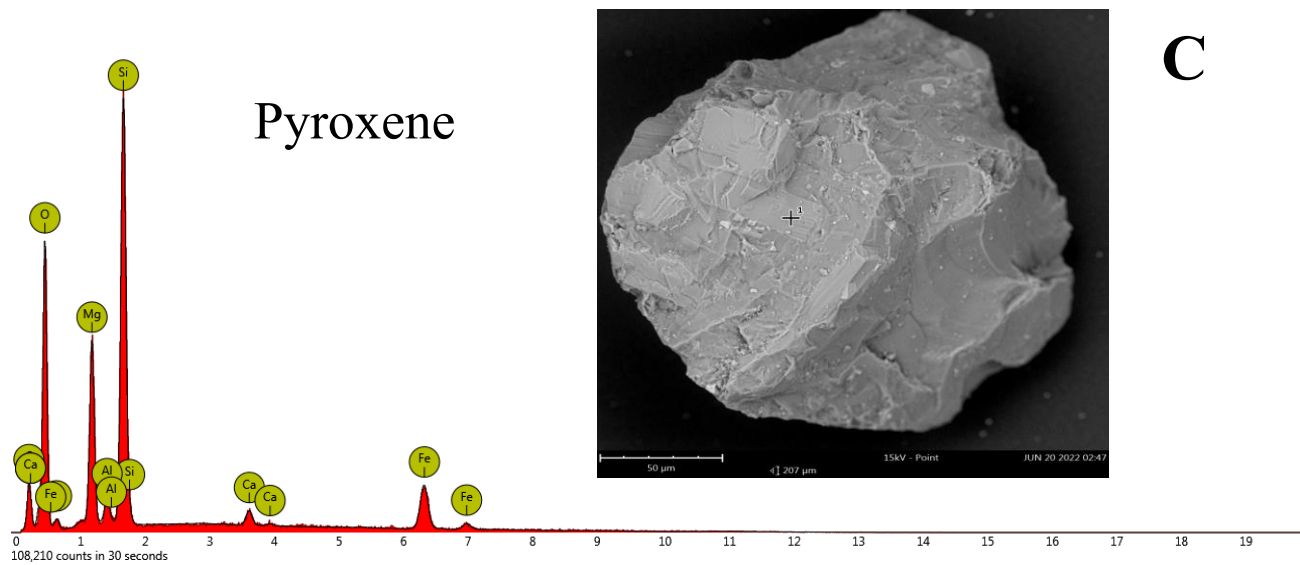

**Figure S2:** Particle size distribution by ParticleMetric software (SEM) of M1, M2, M4, and M5 ash samples.

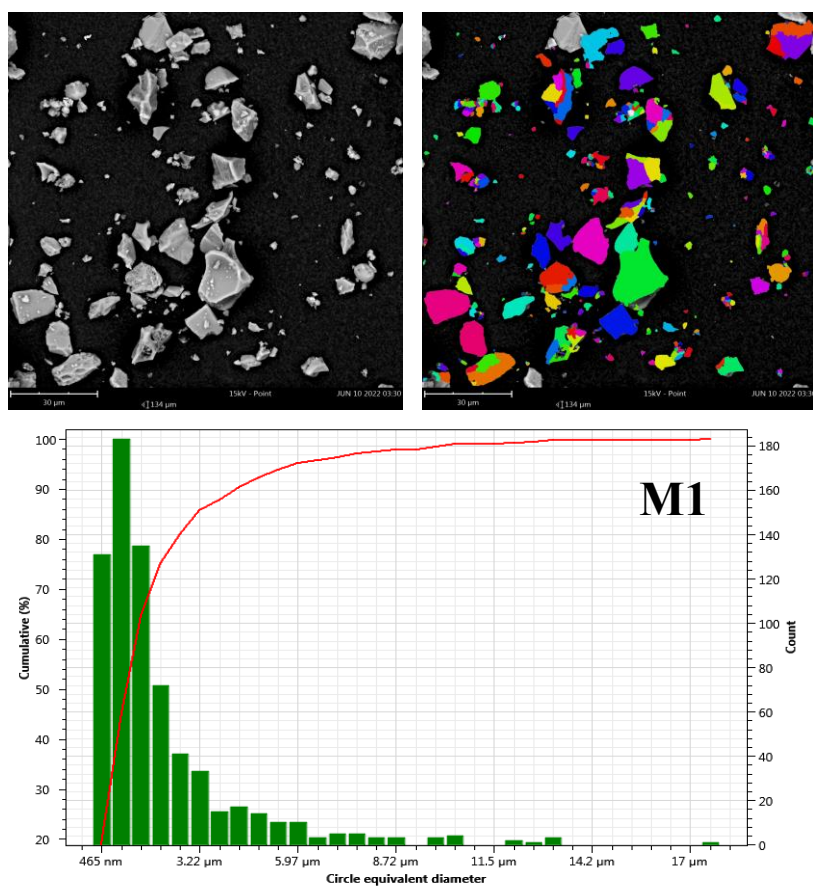

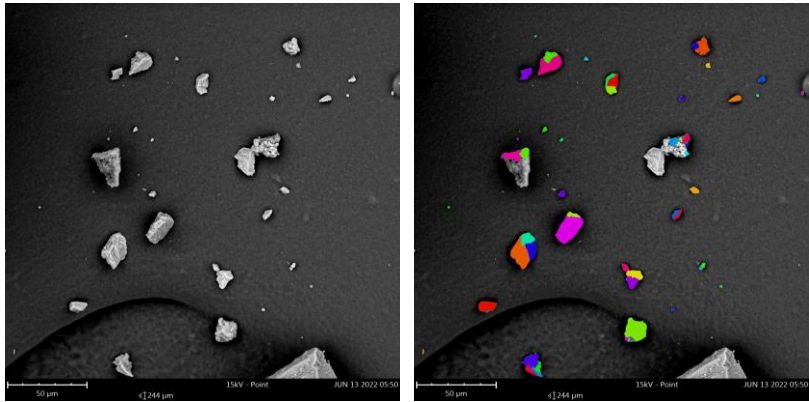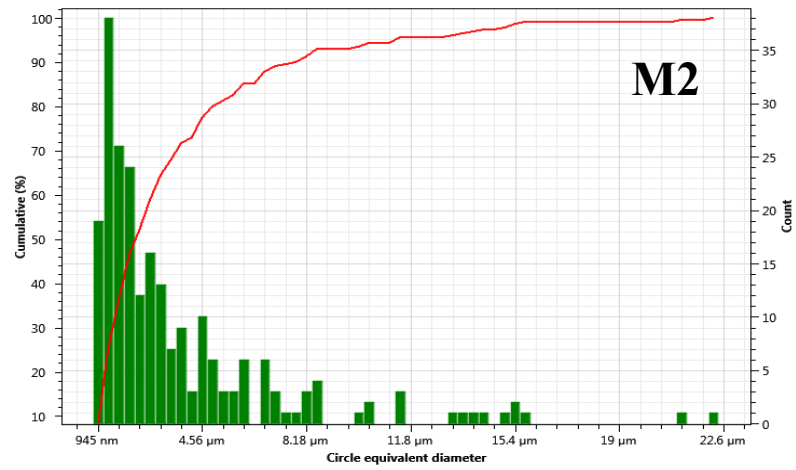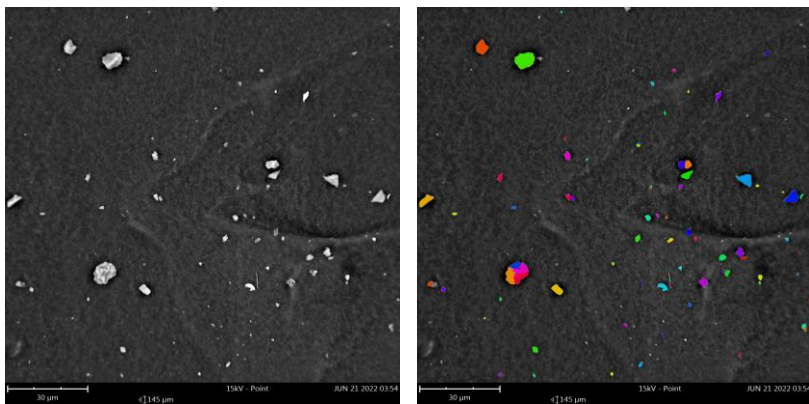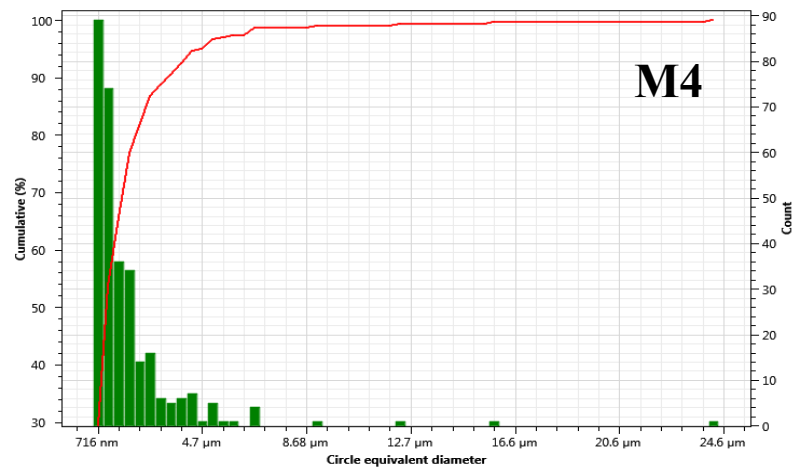

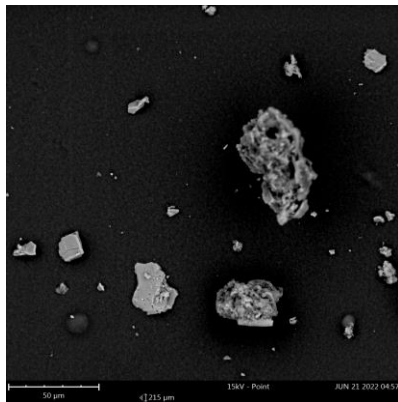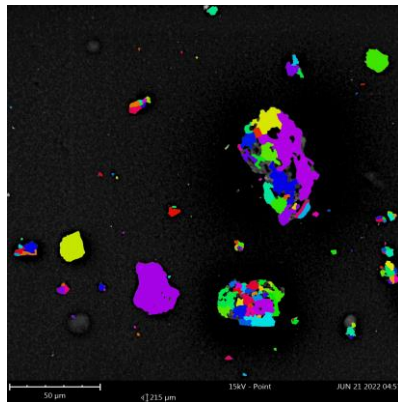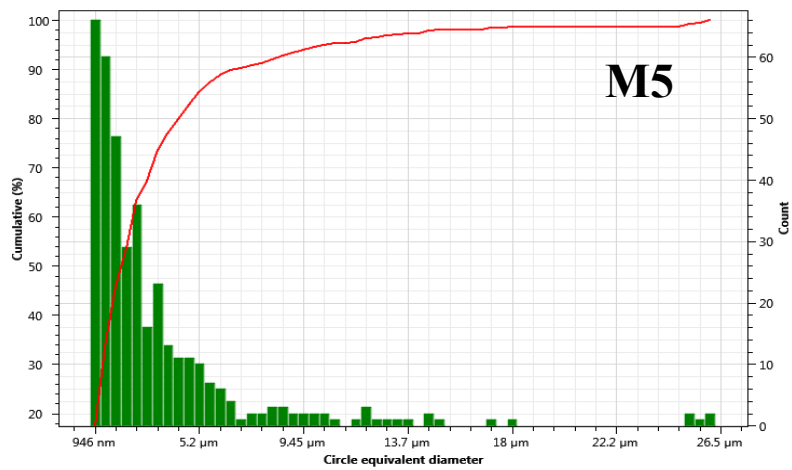

**Table S1:** Chemical composition of Gamble solution (GS) and Artificial lysosomal fluid (ALF) solution used for in vitro lung bioaccessibility.

| Reagent required for 1 L of solution (g) | Formula                                                                         | GS<br>(pH ~ 7.4) | ALF<br>(pH ~ 4.5) |
|------------------------------------------|---------------------------------------------------------------------------------|------------------|-------------------|
| Magnesium chloride hexahydrate           | MgCl <sub>2</sub> ·6H <sub>2</sub> O                                            | 0.10             | 0.05              |
| Sodium chloride                          | NaCl                                                                            | 6.02             | 3.21              |
| Potassium chloride                       | KCl                                                                             | 0.30             | -                 |
| Disodium hydrogen phosphate              | Na <sub>2</sub> HPO <sub>4</sub>                                                | 0.13             | 0.07              |
| Sodium sulphate                          | Na <sub>2</sub> SO <sub>4</sub>                                                 | 0.06             | 0.04              |
| Calcium chloride dihydrate               | CaCl <sub>2</sub> ·2H <sub>2</sub> O                                            | 0.37             | 0.13              |
| Sodium acetate                           | C <sub>2</sub> H <sub>3</sub> O <sub>2</sub> Na                                 | 0.57             | -                 |
| Sodium hydrogen carbonate                | NaHCO <sub>3</sub>                                                              | 2.6              | -                 |
| Sodium citrate dihydrate                 | C <sub>6</sub> H <sub>5</sub> Na <sub>3</sub> O <sub>7</sub> ·2H <sub>2</sub> O | 0.10             | 0.08              |
| Sodium hydroxide                         | NaOH                                                                            | -                | 6                 |
| Citric acid                              | C <sub>6</sub> H <sub>8</sub> O <sub>7</sub>                                    | -                | 20.8              |
| Glycine                                  | H <sub>2</sub> NCH <sub>2</sub> COOH                                            | -                | 0.06              |
| Sodium tartrate dihydrate                | C <sub>4</sub> H <sub>4</sub> O <sub>6</sub> Na <sub>2</sub> ·2H <sub>2</sub> O | -                | 0.09              |
| Sodium lactate                           | C <sub>2</sub> H <sub>5</sub> NaO <sub>3</sub>                                  | -                | 0.09              |
| Sodium pyruvate                          | C <sub>3</sub> H <sub>3</sub> O <sub>3</sub> Na                                 | -                | 0.09              |
